# Supplementary material
Source: PubMed Central journal article supplement (PMC4791832)
Supplement: CJN.06370615_CJN06370615SupplementaryData1.pdf [file CJN.06370615_CJN06370615SupplementaryData1.pdf]

## Supplement

- Patrick S. Parfrey      Department of Medicine, Health Sciences Center, St. John's, NL, Canada
- Geoffrey A. Block      Denver Nephrology, Denver, Colorado
- Ricardo Correa-Rotter      Department of Nephrology and Mineral Metabolism, Salvador Zubirán National Institute of Health Sciences and Nutrition, Mexico City, Mexico
- Tilman B. Drüeke      French Institute of Health and Medical Research Unit 1088, Faculty of Medicine and Pharmacy, University of Picardie, Amiens, France
- Jürgen Floege      Department of Nephrology, RWTH Aachen University Hospital, Aachen, Germany
- Charles A. Herzog      Department of Internal Medicine, Hennepin County Medical Centre, University of Minnesota, Minneapolis, Minnesota
- Gerard M. London      Service of Nephrology, Manhès Hospital, Paris, France
- Kenneth W. Mahaffey      Department of Medicine, Stanford University School of Medicine, Palo Alto, California
- Sharon M. Moe      Department of Medicine, Indiana University School of Medicine and Roudebush Veterans Administration Medical Center, Indianapolis, Indiana
- David C. Wheeler      Centre for Nephrology, University College London, United Kingdom
- Glenn M. Chertow      Department of Medicine, Stanford University School of Medicine, Palo Alto, California
